# Supplementary material for: The long non-coding RNA SAMMSON is essential for uveal melanoma cell survival
Source: PubMed Central journal article supplement (PMC8724009; doi:10.1038/s41388-021-02006-x), 2021-09-10

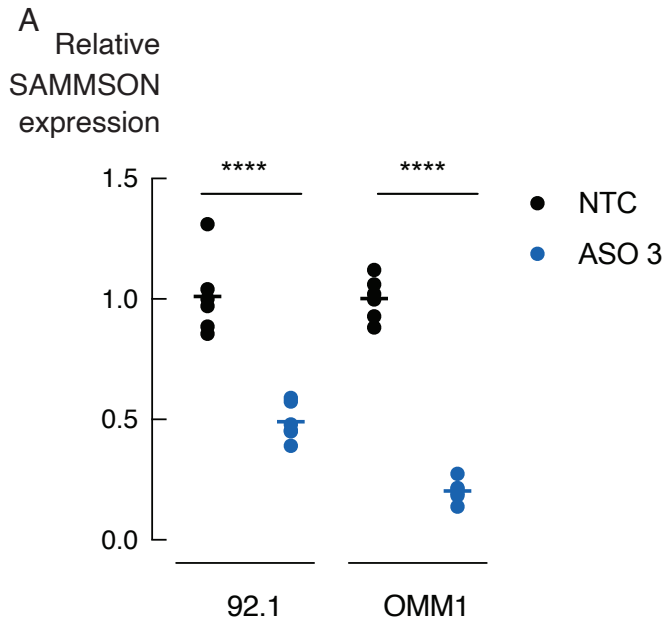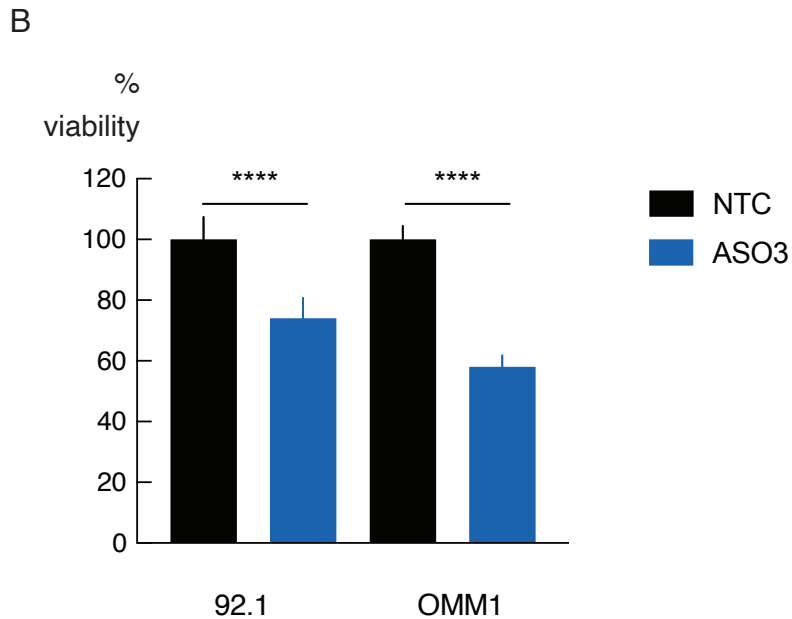

Supplement: 41388_2021_2006_MOESM6_ESM.pdf [file 41388_2021_2006_MOESM6_ESM.pdf]
