# Supplementary material for: The long non-coding RNA SAMMSON is essential for uveal melanoma cell survival
Source: PubMed Central journal article supplement (PMC8724009; doi:10.1038/s41388-021-02006-x), 2021-09-10

A

Normalized confluence

92.1

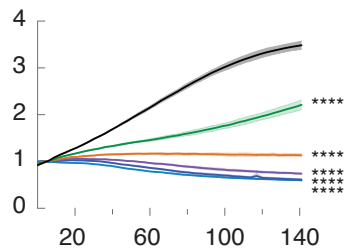

OMM1

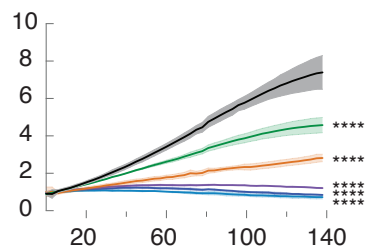

Relative Annexin V

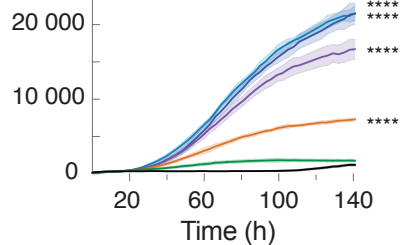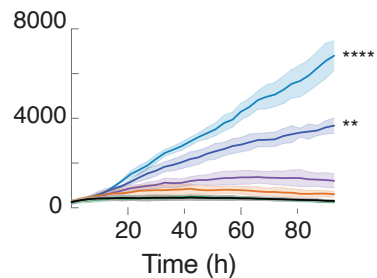

— 0 — 3.125 — 6.25 — 12.5 — 25 — 50

Tigecycline ( $\mu\text{M}$ )

B

Relative % confluence

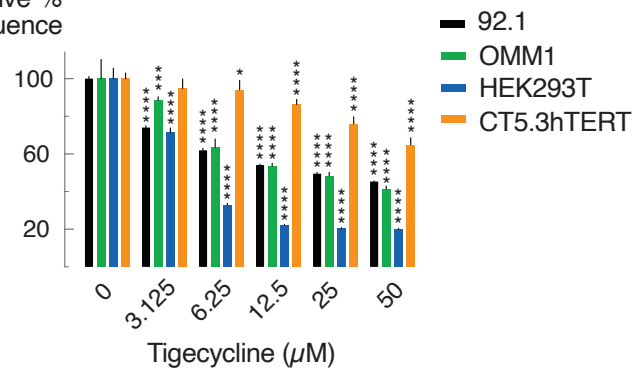

Supplement: 41388_2021_2006_MOESM10_ESM.pdf [file 41388_2021_2006_MOESM10_ESM.pdf]
